# Supplementary material for: Therapeutic Response Monitoring with 89Zr-DFO-Pertuzumab in HER2-Positive and Trastuzumab-Resistant Breast Cancer Models
Source: Pharmaceutics. 2022 Jun 24;14(7):1338. doi: 10.3390/pharmaceutics14071338 (PMC9324044; doi:10.3390/pharmaceutics14071338)
Supplement: Supplementary file 1 [file pharmaceutics-14-01338-s001.zip › pharmaceutics-1745518-supplementary.pdf]

Supplementary File

## Therapeutic Response Monitoring with $^{89}\text{Zr}$ -DFO-Pertuzumab in HER2 Positive and Trastuzumab Resistant Breast Cancer Model

Minwoo Kang <sup>1,†</sup>, Jong Il Shin <sup>1,†</sup>, Sangjin Han <sup>1</sup>, Jung Young Kim <sup>1</sup>, Jeonghoon Park <sup>2</sup>, Kwang Il Kim <sup>1</sup>, Joo Hyun Kang <sup>1</sup> and Tae Sup Lee <sup>1,\*</sup>

<sup>1</sup>Division of RI Application, Korea Institute of Radiological and Medical Sciences (KIRAMS), 75 Nowon-ro, Nowon-gu, Seoul, 01812, South Korea;

<sup>2</sup>Korea Atomic Energy Research Institute (KAERI), 29 Geumgu-gil, Jeongup-si, Jeollabuk-do, 56212, South Korea;

<sup>†</sup>These authors equally contributed to this work.

\*Correspondence: nobelcow@kirams.re.kr; Tel.: +82-2-970-1351

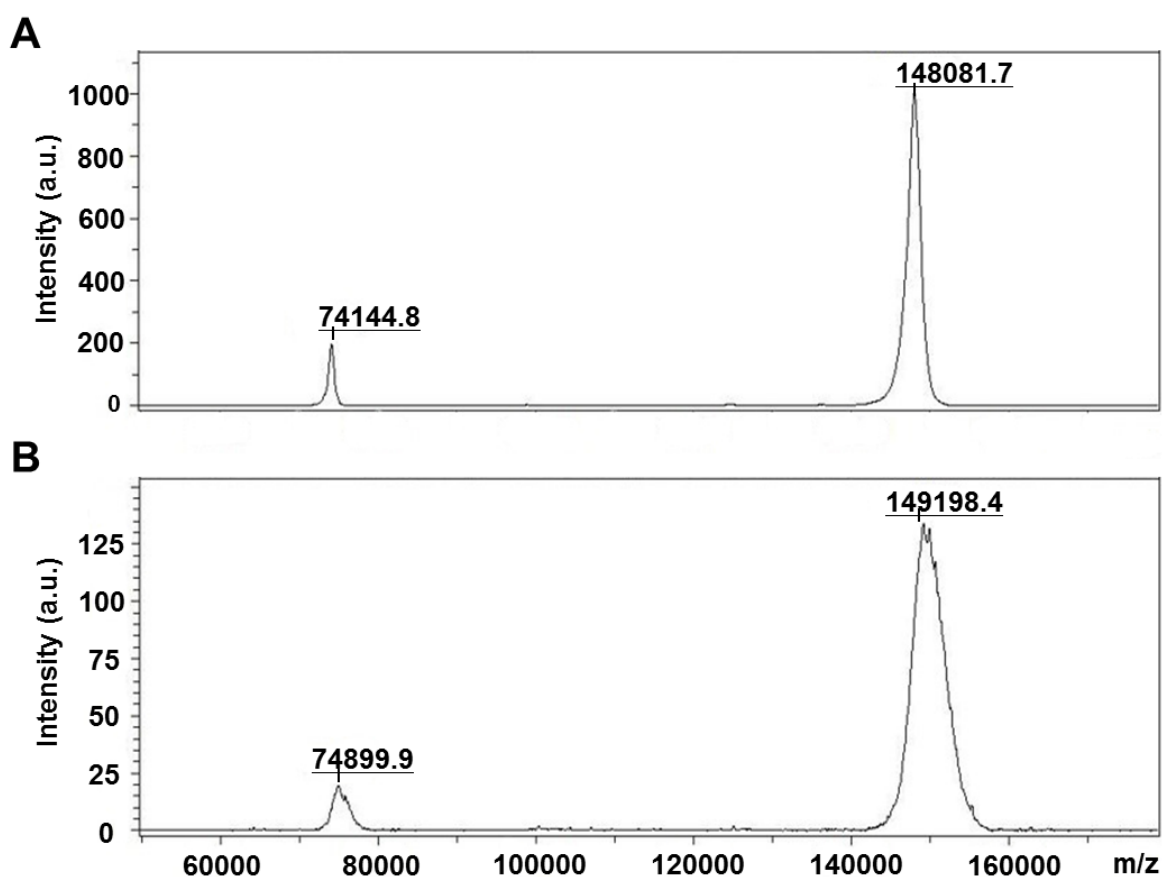

**Supplementary Figure S1. Determination of conjugated number of chelates per pertuzumab.**

MALDI-TOF mass spectra of (A) pertuzumab and (B) DFO-pertuzumab. Pertuzumab was conjugated with DFO as molar ratio 1:10. The molecular peaks gives a degree of  $1.61 \pm 0.02$  DFOs per pertuzumab. a.u., Arbitrary unit.

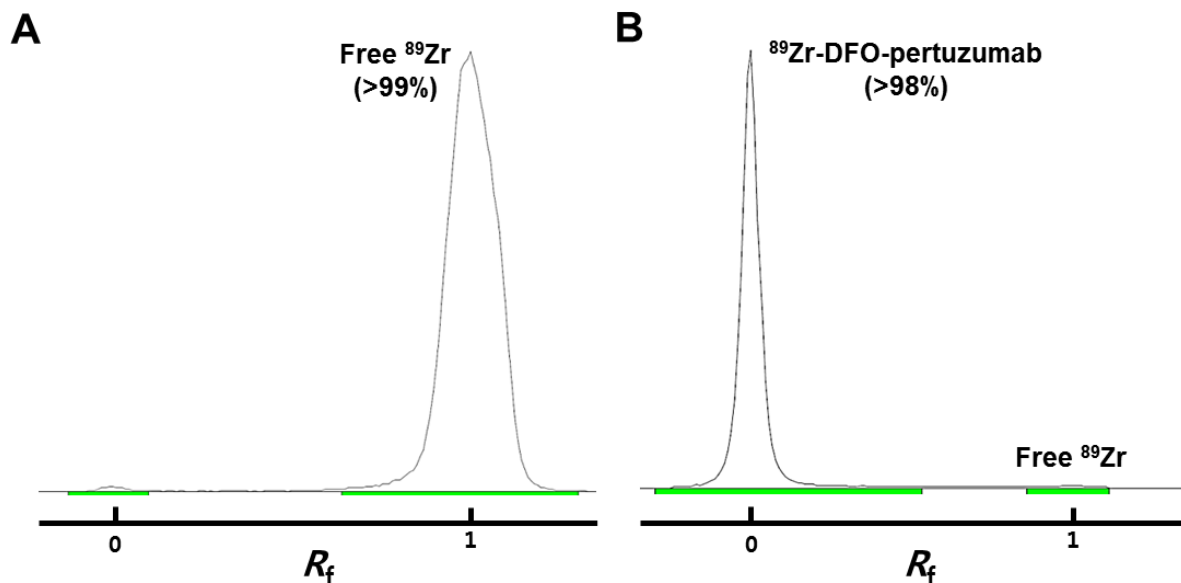

**Supplementary Figure S2. Radiochromatograms of free  $^{89}\text{Zr}$  and  $^{89}\text{Zr}$ -DFO-pertuzumab.**

Analysis of radiolabeling yield and radiochemical purity of  $^{89}\text{Zr}$ -DFO-pertuzumab. Instant thin layer chromatography (ITLC) of free  $^{89}\text{Zr}$  (A) and  $^{89}\text{Zr}$ -DFO-pertuzumab (B). ITLC analysis was performed using ITLC-sg as stationary phase and 20 mM citrate buffer pH 5 with 50 mM EDTA as mobile phase.  $^{89}\text{Zr}$  was successfully radiolabeled with DFO-pertuzumab at high radiolabeling yield and radiochemical purity (> 98%) without further purification.

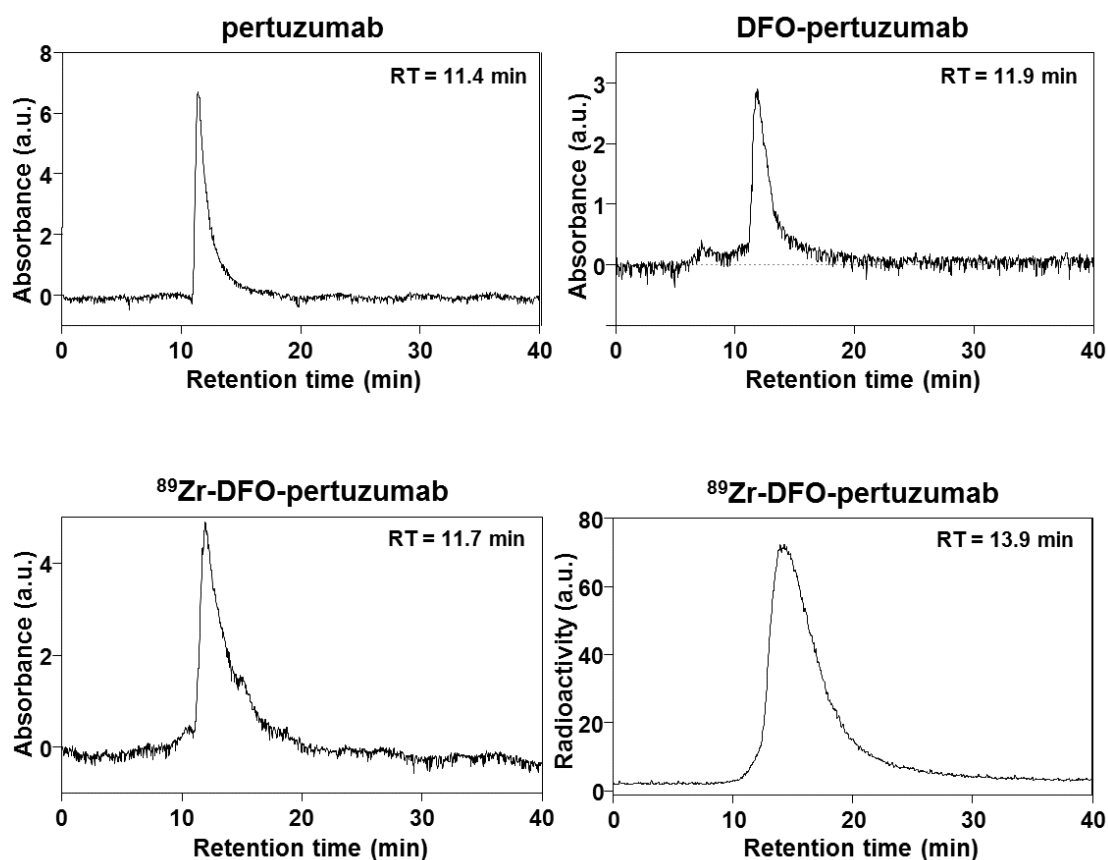

**Supplementary Figure S3. Size exclusion-HPLC chromatograms of pertuzumab, DFO-pertuzumab and <sup>89</sup>Zr-DFO-pertuzumab.** The purity was determined by HPLC analysis with MAbPac SEC-1 as a stationary phase and 0.3 M NaCl in 50 mM sodium phosphate buffer, pH 6.8 as a mobile phase. Samples were eluted at a flow rate of 0.2 mL/min. The retention time of pertuzumab, DFO-pertuzumab, <sup>89</sup>Zr-DFO-pertuzumab was determined by UV absorbance detector at 280 nm and GABI RI detector. The difference of retention time of <sup>89</sup>Zr-DFO-pertuzumab (11.7 min vs. 13.9 min) between absorbance and radioactivity detectors is due to the physical distance between absorbance and radioactivity detector. a.u., Arbitrary unit

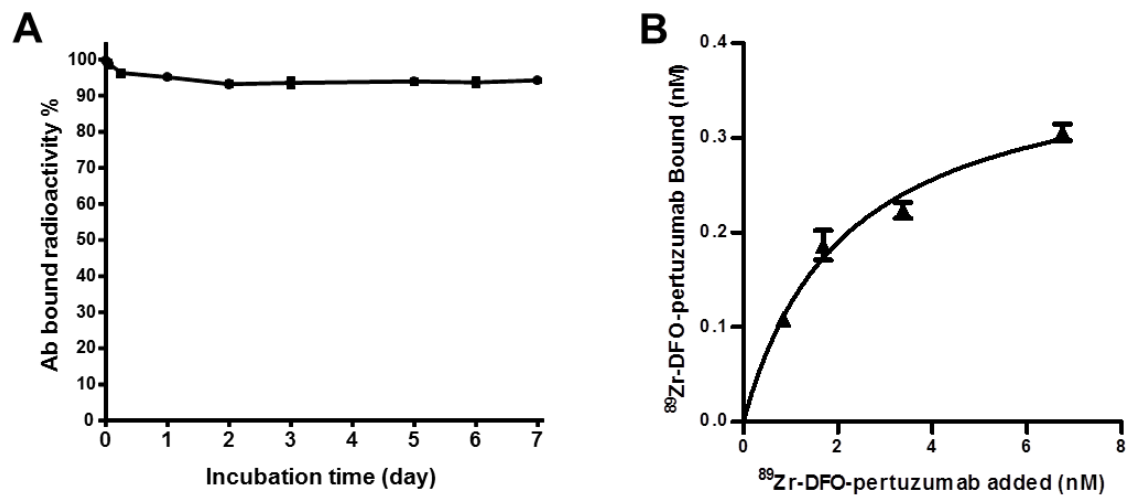

**Supplementary Figure S4. Human serum stability and affinity of <sup>89</sup>Zr-DFO-pertuzumab.**

(A) *In vitro* human serum stability of <sup>89</sup>Zr-DFO-pertuzumab. Radioimmunoconjugates were mixed with equal volume of human serum and incubated at 37 °C. The antibody bound radioactivity (%) of samples was determined by ITLC analysis at each time point. <sup>89</sup>Zr-DFO-pertuzumab showed favorable serum stability with above 94% at 37 °C until 7 days. (B) The affinity of radiolabeled pertuzumab to HER2 measured with human HER2 antigen (250 ng) coated 96-well plate. Nonspecific binding was evaluated with pretreatment of 100-fold excess cold trastuzumab antibody.  $K_d$  value was analyzed with Prism 5.  $K_d$  value of <sup>89</sup>Zr-DFO-pertuzumab was  $2.2 \pm 0.4$  nM.
